# Dietary Monounsaturated Fatty Acids Intake and Risk of Skin Photoaging

Julie Latreille<sup>1,2\*</sup>, Emmanuelle Kesse-Guyot<sup>2</sup>, Denis Malvy<sup>2,3</sup>, Valentina Andreeva<sup>2</sup>, Pilar Galan<sup>2</sup>, Erwin Tschachler<sup>1,4</sup>, Serge Hercberg<sup>2,5</sup>, Christiane Guinot<sup>1,6</sup>, Khaled Ezzedine<sup>2,7</sup>

**1** C.E.R.I.E.S. (Research Centre on Human Skin Founded by CHANEL), Neuilly sur Seine, France, **2** UMR U557 INSERM/U1125 INRA/CNAM, University Paris 13/Centre of Research on Human Nutrition Ile de France, Paris/Bobigny, France, **3** Department of Internal Medicine and Tropical Diseases, Hôpital Saint-André, Bordeaux, France, **4** Department of Dermatology, Medical University of Vienna, Vienna, Austria, **5** Department of Public Health, Hôpital Avicenne, Bobigny, France, **6** Computer Science Laboratory, University François Rabelais, Tours, France, **7** Department of Dermatology, Hôpital Saint-André, Bordeaux, France

## Abstract

**Background:** Intake of monounsaturated fatty acids has been reported to reduce oxidative stress, insulin resistance and related inflammatory processes and may thus protect from skin photoaging. The objective of this study was to investigate the association between the risk of photoaging, monounsaturated fatty acids intake and the sources of monounsaturated fatty acids.

**Methodology/Principal Findings:** A cross sectional study was conducted within the framework of the SUVIMAX cohort. The survey included 1264 women and 1655 men aged between 45 and 60 years old. Dietary monounsaturated fatty acids intakes were estimated by dietary source through at least ten 24-h diet records completed during the first 2.5 years of the follow-up period. Severity of facial skin photoaging was graded by trained investigators at baseline during a clinical examination using a 6-grade scale illustrated by photographs. A lower risk of severe photoaging was associated with higher intakes of monounsaturated fatty acids from olive oil in both sexes. Strikingly, no association was found with intake of monounsaturated fatty acids from animal sources whether from dairy products, meat or processed meat.

**Conclusion/Significance:** These findings support the beneficial effect of dietary olive oil or healthy diet habits associated with olive oil consumption on the severity of facial photoaging.

**Citation:** Latreille J, Kesse-Guyot E, Malvy D, Andreeva V, Galan P, et al. (2012) Dietary Monounsaturated Fatty Acids Intake and Risk of Skin Photoaging. PLoS ONE 7(9): e44490. doi:10.1371/journal.pone.0044490

**Editor:** H. Peter Soyer, The University of Queensland, Australia

**Received:** June 12, 2012; **Accepted:** August 2, 2012; **Published:** September 6, 2012

**Copyright:** © 2012 Latreille et al. This is an open-access article distributed under the terms of the Creative Commons Attribution License, which permits unrestricted use, distribution, and reproduction in any medium, provided the original author and source are credited.

**Funding:** The authors have no support or funding to report.

**Competing Interests:** JL, CG and ET are employees of the C.E.R.I.E.S. There are no patents, products in development or marketed products to declare. This does not alter the authors' adherence to all the PLoS ONE policies on sharing data and materials.

\* E-mail: julie.latreille@ceries-lab.com

## Introduction

In the past century, life-expectancy has increased in most developed countries [1]. Changes to the appearance of the skin represent a visible sign of tissue alteration that occurs with age [2]. More specifically, skin aging is an important public health issue as it may result in the development of a large range of morbidities including non melanoma skin cancers [3].

Skin aging is driven by both intrinsic and extrinsic factors. Intrinsic aging, also referred to as chronological skin aging, is an ineluctable process [4], due to genetically determined loss of cell function with age. Intrinsic skin aging is characterized by fine wrinkles, and dry, thin and pallid skin [5,6]. Extrinsic skin aging overlays intrinsic aging and is dependent on environmental and behavioral factors, in particular sun exposure. Extrinsic aging is characterized by solar elastosis, actinic keratosis, pigmentation and vascular abnormalities. The ultimate stage of this process is skin cancer, namely basal cell carcinomas and squamous cell carcinomas [7–9]. The main factor responsible for extrinsic aging is ultraviolet radiation and is thus referred to as skin photoaging. Skin damage, which may in part be reversible, is mainly driven by

the production of reactive oxygen species (ROS) and related inflammation occurring in response to cumulated or intermittent intense sun exposure. Exposure to UVB damages DNA directly through generation of cyclobutane pyrimidine dimers and 6-4 photoproducts in keratinocytes and melanocytes, whereas UVA damages more indirectly through generation of ROS, leading to lipid peroxidation, activation of transcription factors (NF- $\kappa$ B and AP-1) and DNA strand breaks.

Numerous studies have focused on the possible role of diet in the capacity of the skin to resist damage induced by UV radiation [10]. Although the skin is a major fat storage organ in humans, data on the impact of lipid intake on skin physiology are limited. Low fat intake has been proposed to protect from photodamage [11]. In particular, monounsaturated fatty acids (MUFA) have been reported to reduce oxidative stress, insulin resistance and related inflammation [12–15].

In this context, we have performed an analysis within the framework of the SUVIMAX cohort designed to explore possible associations between the severity of facial skin photoaging, MUFA intake and the sources of MUFA. Photoaging was measured using a 6-grade scale specially developed and validated for assessing the

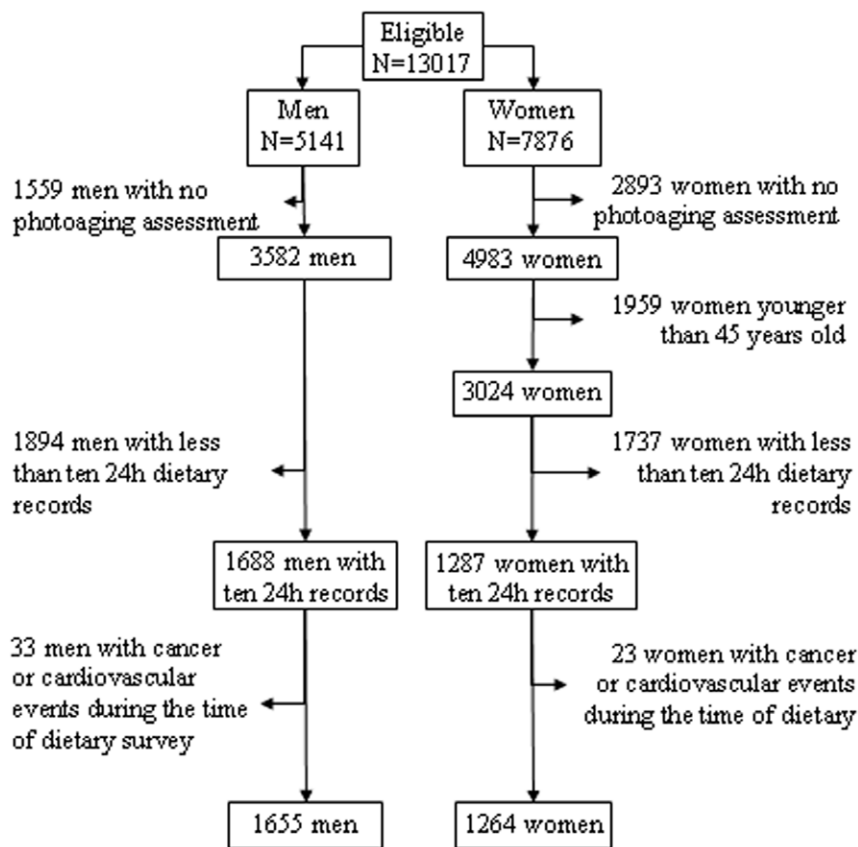

**Figure 1. Flow chart of participants from the SU.VI.MAX study cohort retained in the analysis.**  
doi:10.1371/journal.pone.0044490.g001

overall severity of photodamage, including pigmentation abnormalities, wrinkling and tissue slackening [16].

## Materials and Methods

### Study Population

Subjects were participants in the SU.VI.MAX (*Supplémentation en Vitamines et Minéraux Antioxydants*) study, a double blind, placebo-controlled primary prevention trial evaluating the effect of antioxidant supplementation (a mixture of vitamin C, vitamin E,  $\beta$ -carotene, zinc, and selenium) on the incidence of ischemic heart diseases and of cancers in a population of adult men and women. A total of 13,017 volunteers, 7876 women and 5141 men were included in 1994–1995 with a planned follow-up of eight years. Men were aged 45–60 years and women 35–60 years at enrolment. The design, objectives and methodology of the study have been described *in extenso* elsewhere [17]. All subjects gave their informed written consent to the study. The study was approved by *ad hoc* ethical committees, the “Comité Consultatif de Protection des Personnes dans la Recherche Biomédicale” (CCPPRB no. 706, Cochin Hospital, Paris, France), and the “Commission Nationale de l’Informatique et des Libertés” (CNIL no. 334641). The study was registered at clinicaltrials.gov as NCT00272428 [18].

### Dietary Assessment

In order to take into account possible seasonal and weekly intra-individual variations in dietary intake, subjects were asked to complete a 24-h dietary record every two months from the inclusion to the end of the study for a total of six records per year

(two weekend days and four weekdays per year). Dietary data were collected using the Minitel Telematic Network, a small terminal that was widely used as an adjunct to the telephone in France at the beginning of the study in the 1990s. This 24h record included about 900 items relating to food and drink for each of three meals (breakfast, lunch, and dinner) and for four other possible occasions for food intake (snacks). For each item, the subjects were requested to indicate the portion size consumed. To improve the quality of data collected, subjects received an instruction manual at the start of the study, including photographs of three portion sizes of about 250 foods and drinks. The use of the manual has been validated elsewhere [19]. The questionnaire also included questions on the type of oil or fat used for seasoning and cooking. Other details of these diet diaries have been published previously [17,20]. Subjects who completed at least ten records over a period of 2.5 years after inclusion were selected for this analysis. Ten records were considered to be sufficient to estimate the individual intake of monounsaturated fatty acids (FA) with acceptable accuracy [21]. Finally, all subjects who developed a cancer or a cardiovascular event during the course of the dietary survey (2.5 years) were not included in the analysis (Fig. 1).

### Food Composition Table

Food composition was determined using the SU.VI.MAX food composition table [22] with respect to energy and MUFA. This table was compiled from existing tables, notably the French food composition table [23] and recent updates [24], the USDA National Nutrient Database [25] and the British McCance & Widdowson’s food composition table [26], as well as from original

**Table 1.** Demographic, medical and behavioral characteristics according to photoaging severity.

| Characteristics                       | Women (n = 1264)         |                |                |                  |         | Men (n = 1655)    |                |                |                  |         |        |
|---------------------------------------|--------------------------|----------------|----------------|------------------|---------|-------------------|----------------|----------------|------------------|---------|--------|
|                                       | Photoaging grades        |                |                |                  | P-value | Photoaging grades |                |                |                  | P-value |        |
|                                       | 1-2<br>(n = 193)         | 3<br>(n = 555) | 4<br>(n = 402) | 5-6<br>(n = 114) |         | 1-2<br>(n = 212)  | 3<br>(n = 744) | 4<br>(n = 574) | 5-6<br>(n = 125) |         |        |
| Age (years)                           | 48.8 (3.5)               | 50.6 (4.1)     | 53.2 (4.0)     | 56.5 (3.7)       | <0.0001 | 48.3 (4.2)        | 51.2 (4.4)     | 53.9 (3.9)     | 57.9 (2.6)       | <0.0001 |        |
| BMI (kg/m <sup>2</sup> ) (%)          | <25                      | 76             | 79             | 72               | 72      | 0.13              | 54             | 50             | 50               | 53      | 0.60   |
|                                       | [25–30[                  | 16             | 15             | 22               | 20      |                   | 40             | 44             | 44               | 38      |        |
|                                       | ≥ 30                     | 8              | 5              | 6                | 8       |                   | 6              | 6              | 6                | 8       |        |
| Phototype* (%)                        | I-II                     | 3              | 3              | 6                | 5       | 0.18              | 2              | 2              | 1                | 5       | 0.0001 |
|                                       | IIIa                     | 14             | 12             | 10               | 9       |                   | 12             | 7              | 8                | 6       |        |
|                                       | IIIb                     | 52             | 53             | 49               | 52      |                   | 37             | 45             | 40               | 35      |        |
|                                       | IV                       | 29             | 25             | 29               | 27      |                   | 45             | 41             | 42               | 42      |        |
|                                       | V-VI                     | 1              | 5              | 5                | 6       |                   | 4              | 4              | 9                | 13      |        |
| Lifetime sun exposure* (%)            | None – Low               | 8              | 9              | 10               | 11      | 0.88              | 13             | 10             | 13               | 8       | 0.26   |
|                                       | Moderate                 | 58             | 58             | 59               | 55      |                   | 59             | 60             | 61               | 58      |        |
|                                       | High                     | 33             | 28             | 29               | 30      |                   | 28             | 29             | 26               | 34      |        |
| Overall physical activity* (%)        | Irregular                | 29             | 24             | 25               | 16      | 0.10              | 22             | 24             | 21               | 14      | 0.21   |
|                                       | <1 h/day                 | 34             | 34             | 36               | 31      |                   | 27             | 24             | 23               | 19      |        |
| Smoking habits* (%)                   | ≥1 h/day                 | 37             | 42             | 40               | 54      |                   | 52             | 53             | 56               | 66      |        |
|                                       | Never smokers            | 62             | 66             | 63               | 75      | 0.24              | 34             | 38             | 35               | 35      | 0.67   |
|                                       | Former smokers           | 26             | 25             | 27               | 17      |                   | 55             | 52             | 55               | 50      |        |
| Hormonal status and MHT intake* † (%) | Smokers                  | 11             | 8              | 9                | 8       |                   | 11             | 11             | 10               | 15      |        |
|                                       | Non-menop                | 74             | 59             | 37               | 13      | <0.0001           |                |                |                  |         |        |
|                                       | Menop with MHT           | 20             | 30             | 46               | 56      |                   |                |                |                  |         |        |
| Educational level* (%)                | Menop without MHT        | 6              | 12             | 16               | 31      |                   |                |                |                  |         |        |
|                                       | Elementary school        | 22             | 23             | 23               | 25      | 0.38              | 27             | 25             | 25               | 31      | 0.0181 |
|                                       | Secondary school         | 45             | 41             | 48               | 47      |                   | 36             | 33             | 36               | 47      |        |
| Geographic location† (%)              | University or equivalent | 33             | 35             | 29               | 27      |                   | 37             | 41             | 39               | 22      |        |
|                                       | North of France          | 67             | 66             | 72               | 75      | 0.12              | 71             | 67             | 65               | 77      | 0.0267 |
|                                       | South of France          | 33             | 34             | 28               | 25      |                   | 29             | 33             | 35               | 23      |        |

Values are expressed as means (SD) or percentages. Differences in demographic, medical and behavioral characteristics between photoaging grades were examined using analysis of variance for continuous variables (age) and the  $\chi^2$  test for categorical variables.

\*Due to possible missing values the sum of the cell frequencies can be smaller than the total indicated in the top of the columns.

†France has been arbitrarily divided in north and south using the northern frontier of Aquitaine, Limousin, Auvergne, and Rhône-Alpes regions.

‡MHT: menopausal hormone therapy.

doi:10.1371/journal.pone.0044490.t001

publications. In addition, vitamin E and vitamin C intake was estimated using the SU.VI.MAX food composition table. The MUFA intake from each food category for each individual was then estimated as follows. Each complex dish was first broken down into each of its constitutive simple food items (for example, pies into butter, milk...) using a recipe table validated by dietitians. Then, simple food items were grouped into food group, such as vegetable oils, dairy products, meats and processed meats.

### Outcome Variable

The severity of facial skin photoaging was assessed at baseline by trained investigators using a six-grade ordinal scale, each grade being depicted by three photographs to illustrate the diversity and the range of manifestations within each grade [4,16]. Due to the restricted age range of our population (middle-aged individuals) grades 1 and 6 were rarely present, thus these extreme grades were grouped with grades 2 and 5, respectively. The outcome variable

was thus expressed in four grades of severity (grades 1–2, 3, 4 and 5–6).

### Covariates

Data on age, geographical location (postcode), smoking habits (never, former, current), physical activity (irregular, less than 1h of walking per day, more than one hour of walking per day), educational level (primary school, secondary school or higher education), and hormonal status (non-menopausal, menopausal with use of menopausal hormone therapy, menopausal without use of menopausal hormone therapy) were collected through a self-administrated questionnaire at inclusion. Height and weight were measured using standardised procedures in subjects wearing undergarments. Body mass index (BMI) was calculated as weight (in kilograms) divided by height (in meters, squared), and categorized into three groups: <25 kg/m<sup>2</sup>, 25–30 kg/m<sup>2</sup>, ≥30 kg/m<sup>2</sup>. For geographical location, France was arbitrarily

**Table 2.** Dietary factors according to photoaging severity.

| Dietary factors             | Women (n = 1264)  |                |                |                  |         | Men (n = 1655)    |                |                |                  |         |
|-----------------------------|-------------------|----------------|----------------|------------------|---------|-------------------|----------------|----------------|------------------|---------|
|                             | Photoaging grades |                |                |                  | P-value | Photoaging grades |                |                |                  | P-value |
|                             | 1-2<br>(n = 193)  | 3<br>(n = 555) | 4<br>(n = 402) | 5-6<br>(n = 114) |         | 1-2<br>(n = 212)  | 3<br>(n = 744) | 4<br>(n = 574) | 5-6<br>(n = 125) |         |
| Monounsaturated fat (% TEI) | 15.5 (2.4)        | 15.5 (2.8)     | 14.8 (3)       | 15.1 (3.4)       | 0.0106  | 14.8 (2.9)        | 14.7 (2.9)     | 14.5 (2.8)     | 13.9 (2.8)       | 0.0005  |
| Monounsaturated fat from    |                   |                |                |                  |         |                   |                |                |                  |         |
| Dairy (%TEI)                | 4.2 (1.7)         | 4.2 (1.7)      | 4.3 (1.7)      | 4.4 (1.5)        | 0.73    | 4.1 (1.5)         | 4.0 (1.6)      | 4.0 (1.8)      | 4.0 (1.5)        | 0.61    |
| Meat (%TEI)                 | 1.1 (0.8)         | 1.0 (0.9)      | 1.0 (0.8)      | 1.0 (0.9)        | 0.12    | 1.3 (1.1)         | 1.2 (0.9)      | 1.1 (0.9)      | 1.1 (0.8)        | 0.28    |
| Processed meats (%TEI)      | 1.1 (1.1)         | 1.1 (1.3)      | 1.0 (1.3)      | 1.1 (1.4)        | 0.35    | 1.6 (1.5)         | 1.4 (1.5)      | 1.4 (1.4)      | 1.4 (1.6)        | 0.31    |
| Vegetable oils (%TEI)       | 3.9 (2.5)         | 3.7 (2.3)      | 3.6 (2.0)      | 3.7 (2.0)        | 0.14    | 3.4 (1.9)         | 3.4 (2.1)      | 3.3 (2.1)      | 2.8 (2.0)        | 0.01    |
| Olive oil (g/day)           | 6.4 (4.4)         | 5.8 (4.8)      | 5.5 (4.4)      | 5.8 (4.6)        | 0.04    | 7.4 (5.8)         | 7.2 (5.2)      | 7.0 (5.4)      | 5.6 (4.1)        | 0.003   |
| Peanut oil (g/day)          | 1.8 (1.6)         | 1.8 (1.9)      | 1.6 (1.6)      | 1.7 (1.4)        | 0.45    | 2.4 (1.8)         | 2.2 (2.1)      | 2.1 (2.0)      | 2.1 (1.6)        | 0.29    |
| Sunflower oil (g/day)       | 4.9 (3.6)         | 5 (4.3)        | 4.9 (3.9)      | 4.9 (3.5)        | 0.93    | 6.1 (4.3)         | 6.1 (4.6)      | 6.1 (5.5)      | 6.1 (4.4)        | 0.90    |
| Energy intake (MJ/day)      | 7.7 (2.2)         | 7.7 (2.6)      | 7.6 (2.4)      | 7.2 (2.5)        | 0.23    | 10.5 (3.1)        | 10.4 (3.2)     | 10.4 (3.2)     | 10.8 (2.4)       | 0.42    |
| Vitamin E (mg/day)          | 11.7 (5.1)        | 11.6 (5.6)     | 11.4 (5.8)     | 11.4 (4.4)       | 0.73    | 13.5 (5.0)        | 13.7 (5.9)     | 13.7 (6.8)     | 14.1 (5.4)       | 0.49    |
| Vitamin C (mg/day)          | 83.0 (47.5)       | 89.1 (54.2)    | 88.8 (55.5)    | 96.4 (51.5)      | 0.17    | 95.5 (56.2)       | 91.2 (57.1)    | 92.3 (62.2)    | 88.5 (56.3)      | 0.50    |

Values are medians (IQR). Differences in dietary factors between photoaging grades were assessed using the Kruskal-Wallis test. TEI, Total energy intake. doi:10.1371/journal.pone.0044490.t002

divided into North and South areas using the northern frontier of Aquitaine, Limousin, Auvergne, and Rhône-Alpes regions. In addition, skin phototype was determined at baseline according to the classification proposed by Césari: I, II, IIIa, IIIb, IV, V, VI [27]. Levels I and VI, which were rare in our population, have been grouped with levels II and V respectively. In addition, lifetime sun exposure was collected using the following question: “How would you describe the intensity of your skin’s exposure to the sun during your lifetime?” none/mild, moderate, or severe [28,29].

For the present analysis, we included 1264 women and 1655 men aged between 45 and 60 years old, from both placebo and intervention groups, with data for dietary intake and skin photodamage (Fig. 1).

### Statistical Analyses

Separate analyses were conducted for each sex. First, nutrient density was calculated by expressing MUFA as a percentage of total energy intake (TEI) and this nutrient density was then categorized into quartiles. Individual MUFA densities from the main food sources and the intake of the three most frequently consumed oils containing large amounts of MUFA were similarly categorized into quartiles.

Due to the ordinal nature of the outcome variable [30], a partial proportional odds model (PPOM) was used to study the relationship between photoaging and MUFA density independent of total energy intake [31]. The model was adjusted for total energy intake, vitamin E and vitamin C intake, age, and other possible confounders (covariates). Results are expressed as estimated odds ratios (ORs) with their 95% confidence intervals (95% CI) for each quartile with respect to the first quartile as the reference. In addition, a trend for linearity was tested by assigning each subject the median value of their quartile, this value being modeled as a continuous variable. In addition, to study the contributions of specific sources of MUFA independent of total MUFA intake, similar models were performed with respect to the dietary origin of MUFA adjusted on the same covariates, as well as for total MUFA

density. Finally, associations between the severity of photoaging and the three most consumed oils (olive oil, sunflower oil and peanut oil) were investigated using the same methods.

All tests were two-sided and type I error was set at  $P < 0.05$ . Statistical analyses were carried out using SAS® software release 9.1.3 (SAS Institute, Cary, NC, USA).

### Results

The distribution of the women and men enrolled according to photoaging severity and by demographic, medical and behavioral variables is presented in Table 1. As expected, the severity of skin photoaging was strongly linked to age in both sexes, with non-menopausal women presented less severe photoaging. In men, a higher severity of skin photoaging was associated with a lower education level, a higher phototype and a higher latitude (North of France). In both sexes, daily intakes of MUFA were lower among the most severe grades of photoaging than among the lowest grades of photoaging (Table 2). Similar associations were found for intake of MUFA from vegetable oils and olive oil.

After adjustment for possible cofounders, a significant association was found in men between severity of photoaging and dietary intake of MUFA (Table 3). Higher intake of MUFA was associated with a lower risk of severe photoaging (highest vs lowest quartile of MUFA: AOR = 0.76, 95%CI (0.57–1.00),  $p = 0.03$ ). For both sexes, a higher consumption of MUFA provided by vegetable oils was found to be associated with a lower risk of severe photoaging (for women: 0.63 (0.44–0.90),  $p = 0.01$ ; for men: 0.55 (0.40–0.76),  $p = 0.0004$ ). No association was found with MUFA intake from dairy products, meats and processed meats. Finally, of the three most frequently consumed oils (sunflower, olive and peanut oil), a significant association was found for olive oil. A higher intake of olive oil was significantly associated with a lower risk of severe photoaging (for women: 0.69 (0.50–0.95),  $p = 0.03$ ; for men: 0.58 (0.43–0.77),  $p = 0.0002$ ). In our population, olive oil was the main source of vegetable oil MUFA (59% and 51%, respectively), whereas sunflower and peanut oils provided only 15% and 13% of vegetable oil MUFA.

**Table 3.** Risk of photoaging according to lipid intakes.

| Fat intake                  | Quartile 1 | Quartile 2       | Quartile 3       | Quartile 4       | P-value* |
|-----------------------------|------------|------------------|------------------|------------------|----------|
| <b>Women (n = 1204)</b>     |            |                  |                  |                  |          |
| Monounsaturated fat (% TEI) | <13.9      | [13.9–15.3[      | [15.3–16.7[      | ≥16.7            |          |
| AOR [95% CI] <sup>†</sup>   | 1.00 (ref) | 0.93 (0.70–1.23) | 0.86 (0.65–1.15) | 0.88 (0.65–1.19) | 0.37     |
| Monounsaturated fat from    |            |                  |                  |                  |          |
| Dairy (%TEI)                | <3.5       | [3.5–4.3[        | [4.3–5.2[        | ≥5.2             | 0.12     |
| AOR [95% CI] <sup>‡</sup>   | 1.00 (ref) | 1.10 (0.84–1.44) | 1.13 (0.84–1.51) | 1.27 (0.95–1.70) |          |
| Meat (%TEI)                 | <0.7       | [0.7–1.0[        | [1.0–1.5[        | ≥1.5             | 0.17     |
| AOR [95% CI] <sup>‡</sup>   | 1.00 (ref) | 1.00 (0.77–1.31) | 0.88 (0.67–1.16) | 0.84 (0.63–1.12) |          |
| Processed meats (%TEI)      | <0.6       | [0.6–1.1[        | [1.1–1.8[        | ≥1.8             | 0.62     |
| AOR [95% CI] <sup>‡</sup>   | 1.00 (ref) | 0.98 (0.74–1.29) | 0.85 (0.65–1.13) | 0.95 (0.71–1.26) |          |
| Vegetable oils (% TEI)      | <2.7       | [2.7–3.7[        | [3.7–4.9[        | ≥4.9             | 0.009    |
| AOR [95% CI] <sup>‡</sup>   | 1.00 (ref) | 0.99 (0.75–1.32) | 0.92 (0.67–1.25) | 0.63 (0.44–0.90) |          |
| Olive oil (g/day)           | <3.8       | [3.8–5.8[        | [5.8–8.4[        | ≥8.4             |          |
| AOR [95% CI] <sup>‡</sup>   | 1.00 (ref) | 0.87 (0.66–1.15) | 0.89 (0.65–1.20) | 0.69 (0.50–0.95) | 0.03     |
| Peanut oil (g/day)          | <1.0       | [1.0–1.7[        | [1.7–2.7[        | ≥2.7             |          |
| AOR [95% CI] <sup>‡</sup>   | 1.00 (ref) | 1.02 (0.77–1.34) | 0.91 (0.67–1.24) | 0.94 (0.69–1.27) | 0.59     |
| Sunflower oil (g/day)       | <3.2       | [3.2–4.9[        | [4.9–7.3[        | ≥7.3             |          |
| AOR [95% CI] <sup>‡</sup>   | 1.00 (ref) | 1.19 (0.90–1.57) | 1.12 (0.82–1.52) | 1.13 (0.79–1.61) | 0.67     |
| <b>Men (n = 1566)</b>       |            |                  |                  |                  |          |
| Monounsaturated fat (% TEI) | <13.2      | [13.2–14.6[      | [14.6–16.0[      | ≥16.0            |          |
| AOR [95% CI] <sup>†</sup>   | 1.00 (ref) | 0.89 (0.69–1.16) | 0.76 (0.58–0.99) | 0.76 (0.57–1.00) | 0.03     |
| Monounsaturated fat from    |            |                  |                  |                  |          |
| Dairy (%TEI)                | <3.2       | [3.2–4.0[        | [4.0–4.8[        | ≥4.8             |          |
| AOR [95% CI] <sup>‡</sup>   | 1.00 (ref) | 0.87 (0.67–1.13) | 1.10 (0.85–1.42) | 1.09 (0.84–1.42) | 0.28     |
| Meat (%TEI)                 | <0.7       | [0.7–1.1[        | [1.1–1.6[        | ≥1.6             |          |
| AOR [95% CI] <sup>‡</sup>   | 1.00 (ref) | 1.16 (0.90–1.48) | 0.99 (0.77–1.28) | 1.00 (0.77–1.30) | 0.76     |
| Processed meats (%TEI)      | <0.8       | [0.8–1.4[        | [1.4–2.3[        | ≥2.3             |          |
| AOR [95% CI] <sup>‡</sup>   | 1.00 (ref) | 1.04 (0.81–1.33) | 0.98 (0.75–1.27) | 1.09 (0.83–1.44) | 0.62     |
| Vegetable oils (% TEI)      | <2.4       | [2.4–3.3[        | [3.3–4.4[        | ≥4.4             |          |
| AOR [95% CI] <sup>‡</sup>   | 1.00 (ref) | 0.71 (0.54–0.92) | 0.61 (0.46–0.81) | 0.55 (0.40–0.76) | 0.0004   |
| Olive oil (g/day)           | <4.7       | [4.7–7.1[        | [7.1–10.0[       | ≥10.0            |          |
| AOR [95% CI] <sup>‡</sup>   | 1.00 (ref) | 0.84 (0.64–1.09) | 0.81 (0.62–1.06) | 0.58 (0.43–0.77) | 0.0002   |
| Peanut oil (g/day)          | <1.4       | [1.4–2.2[        | [2.2–3.3[        | ≥3.3             |          |
| AOR [95% CI] <sup>‡</sup>   | 1.00 (ref) | 1.10 (0.85–1.42) | 0.85 (0.66–1.11) | 0.80 (0.61–1.06) | 0.09     |
| Sunflower oil (g/day)       | <4.0       | [4.0–6.1[        | [6.1–8.7[        | ≥8.7             |          |
| AOR [95% CI] <sup>‡</sup>   | 1.00 (ref) | 0.84 (0.65–1.09) | 0.92 (0.70–1.21) | 0.95 (0.68–1.33) | 0.99     |

TEI, Total energy intake,

\*Probability of Wald test for linear trend.

<sup>†</sup>AOR [95% CI]: Adjusted odds ratio and 95% confidence interval adjusted for age, educational level, smoking status, overall physical activity, body mass index, hormonal status, lifetime sun exposure, phototype, geographic location, vitamin E and C intakes and energy.<sup>‡</sup>Adjusted for the same covariates plus total monounsaturated fat intake (%TEI).

doi:10.1371/journal.pone.0044490.t003

## Discussion

In this study we report a significant association between total intake of MUFA and skin photoaging in men but not in women. When the individual contribution of each source of MUFA was considered, higher intakes of MUFA from vegetable oil were however found to be negatively associated with severe skin photoaging independently of environmental factors known to cause premature and accelerated skin aging in both sexes, whereas intake of MUFA from animal products (dairy products, meat and

processed meats) was not significantly associated with skin photoaging. In particular, a higher consumption of olive oil was inversely correlated with the severity of skin photoaging. Olive oil was the only one of the three vegetable oil sources of MUFA usually consumed in our study population (olive oil, sunflower oil and peanut oil) to present such a protective effect. These findings are consistent with previous studies which have addressed individual aspects of this relationship [32–34]. Hence, Purba et al. [33] reported a negative association between total MUFA intake, olive oil intake and skin aging, whereas Nagata et al. [34]

found a positive association between MUFA intake and skin elasticity. In contrast, another study did not find any association between oleic acid consumption and wrinkled appearance and even reported a higher risk of senile dryness in higher consumers [32]. However, in these two last studies, fatty acids were considered as a whole, without taking into account their specific origin.

The observed negative association between olive oil intake and severe photoaging may be due to its specific fatty acid profile with a high amount of MUFA and a low ratio of n-6 PUFA/n-3 PUFA [35,36]. Indeed, MUFA is far less susceptible to peroxidation than PUFA. In contrast to olive oil, we did not find dairy products to be negatively associated with skin photodamage although they provide comparably high amounts of MUFA to olive oil. However, dairy products are also a rich source of saturated fatty acids, which are known to be associated with insulin resistance and an increase of inflammatory processes [37]. Another hypothesis would be that squalene and polyphenols contained in olive oils may play a role in preventing photodamage [35,36]. Squalene is to a large extent sequestered in the skin (sebum is reported to contain 12%), where it is believed to exert a major protective effect against free radical damage and skin dryness [36]. Polyphenols are also known to be powerful radical scavengers. Both squalene and polyphenols have been assumed to be primarily responsible for the beneficial effects of the Mediterranean diet. Finally, as expected, the consumption of olive oil in our population was also positively associated with high consumption of fruits, vegetables, fish and tea, and negatively associated with sweet products, butter and milk. In that sense, the consumption of olive oil could also be considered as a marker of a healthy diet [38].

Our study has both strengths and limitations. The strengths encompass the assessment of dietary intake based on a mean of ten computerized 24-hour diet records in order to take into account weekly and seasonal intra-individual variability in the intake of the monounsaturated fatty acids, which may be considerable [21].

## References

- Christensen K, Doblhammer G, Rau R, Vaupel JW (2009) Ageing populations: the challenges ahead. *Lancet* 374: 1196–1208.
- Farage MA, Miller KW, Berardesca E, Maibach HI (2010) Psychological and social implications of aging skin: normal aging and the effects of cutaneous disease. In: Farage MA, Miller KW, Maibach HI, editors. *Textbook of Aging Skin*. Berlin: Springer. 949–957.
- Zouboulis CC, Makrantonaki E (2011) Clinical aspects and molecular diagnostics of skin aging. *Clin Dermatol* 29: 3–14.
- Malvy J, Guinot C, Preziosi P, Vaillant L, Tenenhaus M, et al. (2000) Epidemiologic determinants of skin photoaging: baseline data of the SU.VI.MAX cohort. *J Am Acad Dermatol* 42: 47–55.
- Fisher GJ, Kang S, Varani J, Bata-Csorgo Z, Wan Y, et al. (2002) Mechanisms of photoaging and chronological skin aging. *Arch Dermatol* 138: 1462–1470.
- Makrantonaki E, Zouboulis CC (2007) Molecular mechanisms of skin aging: state of the art. *Ann N Y Acad Sci* 1119: 40–50.
- Puizina-Ivic N (2008) Skin aging. *Acta Dermatovenerol Alp Panonica Adriat* 17: 47–54.
- Yaar M, Gilchrist BA (2007) Photoaging: mechanism, prevention and therapy. *Br J Dermatol* 157: 874–887.
- Rabe JH, Mamelak AJ, McElgunn PJ, Morison WL, Sauder DN (2006) Photoaging: mechanisms and repair. *J Am Acad Dermatol* 55: 1–19.
- Sies H, Stahl W (2004) Nutritional protection against skin damage from sunlight. *Annu Rev Nutr* 24: 173–200.
- Black HS (1998) Influence of dietary factors on actinically-induced skin cancer. *Mutat Res* 422: 185–190.
- Galland L (2010) Diet and inflammation. *Nutr Clin Pract* 25: 634–640.
- Quiles JL, Barja G, Battino M, Mataix J, Solfrizzi V (2006) Role of Olive Oil and Monounsaturated Fatty Acids in Mitochondrial Oxidative Stress and Aging. *Nutrition Reviews* 64: S31–S39.
- Gillingham LG, Harris-Janz S, Jones PJ (2011) Dietary monounsaturated fatty acids are protective against metabolic syndrome and cardiovascular disease risk factors. *Lipids* 46: 209–228.
- Bergouignan A, Momken I, Schoeller DA, Simon C, Blanc S (2009) Metabolic fate of saturated and monounsaturated dietary fats: the Mediterranean diet revisited from epidemiological evidence to cellular mechanisms. *Prog Lipid Res* 48: 128–147.
- Larnier C, Ortonne JP, Venot A, Faivre B, Béani JC, et al. (1994) Evaluation of cutaneous photodamage using a photographic scale. *Br J Dermatol* 130: 167–173.
- Hercberg S, Preziosi P, Briançon S, Galan P, Triol I, et al. (1998) A primary prevention trial using nutritional doses of antioxidant vitamins and minerals in cardiovascular diseases and cancers in a general population: the SU.VI.MAX study—design, methods, and participant characteristics. *Supplementation en Vitamines et Minéraux Antioxydants. Control Clin Trials* 19: 336–351.
- Hercberg S, Galan P, Preziosi P, Bertrais S, Mennen L, et al. (2004) The SU.VI.MAX study: a randomized, placebo-controlled trial of the health effects of antioxidant vitamins and minerals. *Arch Intern Med* 164: 2335–2342.
- Le Moulecc N, Deheeger M, Preziosi P, Monteiro P, Valeix P, et al. (1996) Validation du manuel-photos utilisé pour l'enquête alimentaire de l'étude SU.VI.MAX. [Validation of photographic document used to estimate the amounts of foods eaten by subjects in the SU.VI.MAX study]. *Cah Nutr Diet* 31: 158–164.
- Astorg P, Arnault N, Czernichow S, Noisette N, Galan P, et al. (2004) Dietary intakes and food sources of n-6 and n-3 PUFA in French adult men and women. *Lipids* 39: 527–535.
- Mennen LI, Bertrais S, Galan P, Arnault N, Potier de Courcy G, et al. (2002) The use of computerised 24 h dietary recalls in the French SU.VI.MAX Study: number of recalls required. *Eur J Clin Nutr* 56: 659–665.
- Arnault N, Astorg P, Aubert A, Bertrais S, Boutoux S, et al. (2006) Table de composition des aliments. Paris: INSERM/Economica.
- Favier JC, Ireland-Ripert J, Toque C, Feinberg M (1995) Répertoire général des aliments, table de composition. 2nd ed. Paris: Tec & Doc.
- Ireland J, Favier JC, Feinberg M (2002) Répertoire général des aliments. Tome 2: Produits laitiers. Paris: Tec & Doc.
- US Department of Agriculture ARS (2003) National Nutrient Database for Standard Reference, Release 16.
- Ministry of Agriculture FaF (2004) Fatty Acids. Supplement to McCance & Widdowson's *The Composition of Foods*. Cambridge: Royal Society of Chemistry.

27. Cesarini JP (1988) Photo-induced events in the human melanocytic system: photoaggression and photoprotection. *Pigment Cell Res* 1: 223–233.
28. Ezzedine K, Malvy D, Mauger E, Nageotte O, Galan P, et al. (2008) Artificial and natural ultraviolet radiation exposure: beliefs and behaviour of 7200 French adults. *J Eur Acad Dermatol Venerol* 22: 186–194.
29. Guinot C, Malvy D, Latreille J, Preziosi P, Galan P, et al. (2001) Sun exposure behaviour of a general adult population in France. In: Ring J, Weidinger S, Darsow U, editors. *Skin and Environment-Perception and Protection*. Bologne: Monduzzi editore S.p.A. 1099–1106.
30. Peterson B, Harrell FE (1990) Partial Proportional Odds Models for ordinal response variables. *Appl Statist* 39: 205–217.
31. Willett W, Stampfer MJ (1986) Total energy intake: implications for epidemiologic analyses. *Am J Epidemiol* 124: 17–27.
32. Cosgrove MC, Franco OH, Granger SP, Murray PG, Mayes AE (2007) Dietary nutrient intakes and skin-aging appearance among middle-aged American women. *Am J Clin Nutr* 86: 1225–1231.
33. Purba MB, Kouris-Blazos A, Wattanapenpaiboon N, Lukito W, Rothenberg EM, et al. (2001) Skin wrinkling: can food make a difference? *J Am Coll Nutr* 20: 71–80.
34. Nagata C, Nakamura K, Wada K, Oba S, Hayashi M, et al. (2010) Association of dietary fat, vegetables and antioxidant micronutrients with skin ageing in Japanese women. *Br J Nutr* 103: 1493–1498.
35. Owen RW, Giacosa A, Hull WE, Haubner R, Würtele G, et al. (2000) Olive-oil consumption and health: the possible role of antioxidants. *Lancet Oncol* 1: 107–112.
36. Viola P, Viola M (2009) Virgin olive oil as a fundamental nutritional component and skin protector. *Clin Dermatol* 27: 159–165.
37. Riccardi G, Giacco R, Rivellese AA (2004) Dietary fat, insulin sensitivity and the metabolic syndrome. *Clin Nutr* 23: 447–456.
38. Willett WC, Sacks F, Trichopoulos A, Drescher G, Ferro-Luzzi A, et al. (1995) Mediterranean diet pyramid: a cultural model for healthy eating. *Am J Clin Nutr* 61: 1402S–1406S.
